# Supplementary material for: YAP1 and WWTR1 expression inversely correlates with neuroendocrine markers in Merkel cell carcinoma
Source: JCI journal article supplement (doi:10.1172/jci157171), 2023-01-31
Supplement: sd2 [file 2]

This report does not contain a clinical trial and thus no reporting checklist is appropriate. It was suggested by the editor (Rexford S. Ahima) to resubmit to the Clinical Research article. Please see the recommendation below.

“In addition to the comments of the reviewers, the Editors ask that you submit your revised manuscript in the Clinical Medicine category ([https://secure-web.cisco.com/1fehFwXscapSPXxwgDRQTinoOLBsMIDVJMR6EcZIU6LRU1BGCn5ml7uPqj6Dk6xroRpgBKPqJFpXNH8oO4dywKZYU\\_0z63xWiQI3-aC\\_VWA4m\\_YXTtF5aqSKZI9amX2Psa3kddiUwOzthCjyxvLIMUBtE31I6QHERZL7Sxa4q79KGBrHedLQStCF5RxsM9ZBCmh0qz1FeZyr-r\\_DP5DwIZtZUBZOFILVGVLIhxB-vdQA7i3HF57MlxTowTaL6cljF0-CiC3ZfNemQok1pRmjJloJkmyX7SbvXGVO0u-RF9IXE2IQKXtz7WRIdiCrqcLsVF3dNH9BIA0LNFONtwxqpA/https%3A%2F%2Fwww.ici.org%2Fkiosks%2Fsubmission-revised%23Clinical-medicine](https://secure-web.cisco.com/1fehFwXscapSPXxwgDRQTinoOLBsMIDVJMR6EcZIU6LRU1BGCn5ml7uPqj6Dk6xroRpgBKPqJFpXNH8oO4dywKZYU_0z63xWiQI3-aC_VWA4m_YXTtF5aqSKZI9amX2Psa3kddiUwOzthCjyxvLIMUBtE31I6QHERZL7Sxa4q79KGBrHedLQStCF5RxsM9ZBCmh0qz1FeZyr-r_DP5DwIZtZUBZOFILVGVLIhxB-vdQA7i3HF57MlxTowTaL6cljF0-CiC3ZfNemQok1pRmjJloJkmyX7SbvXGVO0u-RF9IXE2IQKXtz7WRIdiCrqcLsVF3dNH9BIA0LNFONtwxqpA/https%3A%2F%2Fwww.ici.org%2Fkiosks%2Fsubmission-revised%23Clinical-medicine)”
